# Supplementary material for: Establishment of a microspheres-based homogeneous fluorescence immunoassay for the rapid detection of cardiac troponin I
Source: Royal Society of Chemistry journal article supplement (doi:10.1039/d4ay00921e), 2024-01-01
Supplement: d4ay00921e1.pdf [file d4ay00921e1.pdf]

No any crystal structures in the CIF reports.
